# Supplementary material for: Rhizobium pongamiaesp. nov. from Root Nodules ofPongamia pinnata
Source: Hindawi journal article supplement (doi:10.1155/2013/165198), 2013-01-01
Supplement: f1 [file 165198.f1.pdf]

**Supplementary Table 1.** Primers sequence information used for amplification and sequencing of 16S rRNA, *recA*, *atpD*, *nifH* and *nodD* genes.

| Gene name       | Primer sequence (5'->3') |                         |
|-----------------|--------------------------|-------------------------|
|                 | Forward                  | Reverse                 |
| <b>16S rDNA</b> | TGAGACACGACCCACTCTAC     | AAGAGCTGGTAAGGTTCTGC    |
| <i>recA</i>     | ATCGAGCGGTCGTTCGGCAAGGG  | TTGCGCAGCGCCTGGCTCAT    |
| <i>atpD</i>     | ATCGGCGAGCCGGTCGACGA     | GCCGACACTTCCGAACCAGCCTG |
| <i>nifH</i>     | AAGACGTGCTCAAGGTCGGC     | GGGATGGTGCCTTTGCCAGA    |
| <i>NodD</i>     | ATCAACCTCAGCCAACCCGC     | CACGTCCGAACTTAGCCGCA    |
